# Supplementary material for: The palmitoyl acyltransferase ZDHHC14 controls Kv1-family potassium channel clustering at the axon initial segment
Source: eLife. 2020 Nov 13;9:e56058. doi: 10.7554/eLife.56058 (PMC7685708; doi:10.7554/eLife.56058)
Supplement: Figure 1—source data 1. [file elife-56058-fig1-data1.xlsx]

## Sheet: Figure 1
Figure 1D						Figure 1-figure supplement 3
PSD93a + vector	PSD93a + HA-ZDHHC14 LSSV	PSD93a + HA-ZDHHC14 LSSE	PSD93b + vector	PSD93b + HA-ZDHHC14 LSSV	PSD93b + HA-ZDHHC14 LSSE	PSD93a + vector	PSD93a + HA-ZDHHC14 LSSV	PSD93a + HA-ZDHHC14 LSSE	PSD93b + vector	PSD93b + HA-ZDHHC14 LSSV	PSD93b + HA-ZDHHC14 LSSE
0.878604	3.59609	1.27233	0.395464	5.50104	2.46163	0.878604	3.59609	1.27233	1.76115	24.4982	10.9625
0.719408	6.9597	4.17118	1.6761	6.67667	3.82939	0.719408	6.9597	4.17118	7.46428	29.7337	17.0537
1.19429	6.65866	2.17909	0.911057	5.36529	2.53277	1.19429	6.65866	2.17909	4.05727	23.8936	11.2794
1.26975	5.23921	2.38294	1.01738	5.97709	3.74152	1.26975	5.23921	2.38294	4.53077	26.6182	16.6623
0.937954	3.43826	0.765167				0.937954	3.43826	0.765167
1	6.15065	1.95936				1	6.15065	1.95936
