# Supplementary material for: The palmitoyl acyltransferase ZDHHC14 controls Kv1-family potassium channel clustering at the axon initial segment
Source: eLife. 2020 Nov 13;9:e56058. doi: 10.7554/eLife.56058 (PMC7685708; doi:10.7554/eLife.56058)
Supplement: Figure 2—source data 1. [file elife-56058-fig2-data1.xlsx]

## Sheet: Figure 2
Figure 2B				Figure 2D				Figure 2E		Figure 2 - figure supplement 1B				Figure 2 - figure supplement 1D				Figure 2 - figure supplement 1E
Control - Band 1	Control - Band 2	14sh1 - Band 1	14sh1 - Band 2	Control - PSD93	14sh1 - PSD93	Control - GAP43	14sh1 - GAP43	Control - PSD93	14sh1 - PSD93	Control - Band 1	Control - Band 2	14sh1 - Band 1	14sh1 - Band 2	Control - PSD93	14sh1 - PSD93	Control - GAP43	14sh1 - GAP43	Control - PSD93	14sh1 - PSD93
1	0.38359	0.0974355	0	0.867	0.425	0.908	1.079	0.92112	0.757848	1	0.613084	0.0983186	0.0160565	0.865	0.132	0.854	1.021	1.283	1.46
1	0.493333	0.0552912	0.0232119	1.133	0.628	1.092	0.995	1.07888	0.99176	1	0.75	0.03	0.01	0.833	0.288	0.822	0.825	0.807	0.884
1	0.626289	0.103399	0.0642249	1.327	0.455	0.933	0.999	0.635588	0.470064	1	0.697972	0.0559662	0.0081531	1.134	0.409	1.105	0.619	0.909	0.699
1	0.663438	0.118769	0.0984158	0.673	0.122	1.067	0.878	1.36441	0.413315	1	0.642312	0.00189568	0	1.104	0.382	1.329	1.46	1	0.998
1	0.61708	0.0940284	0.0980362	1	0.438	0.854	0.913	1.209	0.939	1	0.741144	0.0117206	0.00269871	1.065	0.447	0.891	0.872	1	1.123
1	0.498462	0.127622	0.00632867	1	0.089	1.146	0.84	0.791323	0.479285
1	0.747826	0.0601753	0	1.062	0.21	0.908	1.06	0.928167	0.815831
1	0.635258	0.0191916	0	0.849	0.235	0.913	0.928	0.663592	0.438968
1	0.429594	0	0	0.799	0.335	0.939	1.205	1	0.700593
				0.902	0.429	1.211	0.897	1.4896	0.912883
				1.364	0.748	0.914	0.665	1.09066	0.62754
				1.023	0.566	1.114	1.002	0.827981	0.661935
