# Supplementary material for: The palmitoyl acyltransferase ZDHHC14 controls Kv1-family potassium channel clustering at the axon initial segment
Source: eLife. 2020 Nov 13;9:e56058. doi: 10.7554/eLife.56058 (PMC7685708; doi:10.7554/eLife.56058)
Supplement: Figure 3—source data 1. [file elife-56058-fig3-data1.xlsx]

## Sheet: Figure 3
Figure 3C		Figure 3D		Figure 3E		Figure 3 - figure supplement 2C		Figure 3 - figure supplement 2D		Figure 3 - figure supplement 2E
Control - mean gray value	14sh1 - mean gray value	Control - AIS length	14sh1 - AIS length	Control - integrated density	14sh1 - integrated density	Control - mean gray value	14sh1 - mean gray value	Control - AIS length	14sh1 - AIS length	Control - integrated density	14sh1 - integrated density
1	0.784421	42.3124	25.1504	1	0.549957	1.04957	1.00328	38.8979	27.2653	1.11354	0.57138
0.933828	0.772725	38.1329	25.409	1.06496	0.589682	0.950425	0.934394	36.3631	29.5001	0.886464	0.642797
1.06617	0.850924	43.12	29.7907	0.935043	0.478095	1	1.00344	34.6476	24.793	1	0.817629
