# Supplementary material for: The palmitoyl acyltransferase ZDHHC14 controls Kv1-family potassium channel clustering at the axon initial segment
Source: eLife. 2020 Nov 13;9:e56058. doi: 10.7554/eLife.56058 (PMC7685708; doi:10.7554/eLife.56058)
Supplement: Figure 4—source data 1. [file elife-56058-fig4-data1.xlsx]

## Sheet: Figure 4
Figure 4C				Figure 4 - figure supplement 1C
wtPSD93b - AIS restricted	wtPSD93b - diffuse	PSD93b 5CS - AIS restricted	PSD93b 5CS - diffuse	WT	C10S	C16,18S	C10,16,18S	5CS
70	30	30	70	0.961607	0.283656	0.630032	0.487736	0
60	40	30	70	0.88417	0.0290476	0.75369	0.28038	0.00546561
70	30	40	60	1.15422	0.0635716	0.357771	0.11413	0.0050846
