# Supplementary material for: The palmitoyl acyltransferase ZDHHC14 controls Kv1-family potassium channel clustering at the axon initial segment
Source: eLife. 2020 Nov 13;9:e56058. doi: 10.7554/eLife.56058 (PMC7685708; doi:10.7554/eLife.56058)
Supplement: Figure 5—source data 1. [file elife-56058-fig5-data1.xlsx]

## Sheet: Figure 5
	Figure 5B
DIV	ZDHHC14 band 1				PSD93				Kv1.2				Kv1.1				Kv1.4				GLUN2B
1	0.003	0.019	0.001	0	0	0.019	0	0.011	0.009	0	0	0.007	0	0.005	0.003	0.001	0.003	0	0	0.002	0.001	0.015	0.005	0.012
4	0	0	0.037	0.004	0	0.015	0.025	0.03	0	0.007	0	0.023	0.005	0.006	0	0	0.008	0	0.007	0.017	0.158	0.09	0.099	0.074
8	0.158	0.086	0.132	0.441	0.084	0.093	0.074	0.293	0.029	0.084	0.021	0.108	0.037	0.028	0.085	0.163	0.122	0.137	0.085	0.214	0.573	0.51	0.658	0.67
12	0.343	0.503	0.551	0.684	0.37	0.364	0.388	0.921	0.374	0.517	0.398	0.548	0.298	0.352	0.444	0.636	0.474	0.57	0.492	0.656	0.884	0.802	1.126	1.164
16	1.058	1.08	0.942	0.92	1.181	1.334	0.819	0.666	1.142	1.221	0.858	0.779	1.12	0.88	0.926	1.074	1.127	1.029	0.873	0.971	1.209	0.791	1
