# Supplementary material for: The palmitoyl acyltransferase ZDHHC14 controls Kv1-family potassium channel clustering at the axon initial segment
Source: eLife. 2020 Nov 13;9:e56058. doi: 10.7554/eLife.56058 (PMC7685708; doi:10.7554/eLife.56058)
Supplement: Figure 6—source data 1. [file elife-56058-fig6-data1.xlsx]

## Sheet: Figure 6
Figure 6B						Figure 6C
Control - Kv1.1	14sh1 - Kv1.1	Control - Kv1.2	14sh1 - Kv1.2	Control - Kv1.4	14sh1 - Kv1.4	Control - Kv1.1	14sh1 - Kv1.1	Control - Kv1.2	14sh1 - Kv1.2	Control - Kv1.4	14sh1 - Kv1.4
1	0.817225	1.165	1.176	0.781	0.213	0.725	0.692	0.787	0.47	0.984071	0.800658
1	0.740231	0.835	0.968	1.219	0.534	1.191	1.05	1.213	0.727	1.01593	0.937741
1.135	0.720974	1.286	0.863	0.788	0.456	0.941	0.938	1.063	0.985	1.17766	0.684
0.865043	0.572344	1	0.94	1.212	0.297	1.059	0.688	1.064	0.718	0.822336	0.351989
0.753105	0.646049	0.574	0.49	1.266	0.399	0.972	1.007	1.054	0.994	1.091	0.67
1.2469	0.361595	1	0.411	0.734	0.271	1.02764	1.08347	0.945711	1.02431	0.909173	0.516247
0.859266	0.544172	1	0.269	1.03	0.433	0.895	0.534	0.936	0.681	0.845855	0.506199
1	0.395428	1.398	0.911	1	0.319	1.189	0.332	0.975	0.532	1	0.598
1.17929	0.668326	0.742	0.474	0.769	0.315	0.902	0.54	0.962	0.521	1	0.657
0.961446	1.02816	0.991031	0.348168	1.363	0.375	1.098	0.764			1.15414	0.580223
				0.838	0.282					1	0.647
