# Supplementary material for: The palmitoyl acyltransferase ZDHHC14 controls Kv1-family potassium channel clustering at the axon initial segment
Source: eLife. 2020 Nov 13;9:e56058. doi: 10.7554/eLife.56058 (PMC7685708; doi:10.7554/eLife.56058)
Supplement: Figure 7—source data 1. [file elife-56058-fig7-data1.xlsx]

## Sheet: Figure 7
Figure 7C - Kv1.1		Figure 7D - Kv1.1		Figure 7G - Kv1.2		Figure 7H - Kv1.2		Figure 7K - Kv1.4		Figure 7L - Kv1.4
Control - integrated density	14sh1 - integrated density	Control - mean gray value	14sh1 - mean gray value	Control - integrated density	14sh1 - integrated density	Control - mean gray value	14sh1 - mean gray value	Control - integrated density	14sh1 - integrated density	Control - mean gray value	14sh1 - mean gray value
0.885048	0.905058	0.95635	0.984792	0.978643	0.862218	0.955353	0.967022	1	0.63	1	0.76
1.11495	0.677112	1.04365	0.908308	1.02136	0.525691	1.04465	0.910502	1.13	0.45	0.99	0.73
1	0.289045	1	0.65058	1	0.464038	1	0.634496	0.87	0.3	1.01	0.51
1	0.497642	1	0.794047	1	0.734498	1	1.15663	1	0.27	1	0.55
1	0.789128	1	0.661328
