# Supplementary material for: The palmitoyl acyltransferase ZDHHC14 controls Kv1-family potassium channel clustering at the axon initial segment
Source: eLife. 2020 Nov 13;9:e56058. doi: 10.7554/eLife.56058 (PMC7685708; doi:10.7554/eLife.56058)
Supplement: Figure 8—source data 1. [file elife-56058-fig8-data1.xlsx]

## Sheet: Figure 8
Figure 8B
Distance (um)	HA-ZDHHC14 intensity	GM130 intesity
0	111.25	37.75
0.1153	104.979	29.57
0.2306	89.451	23.008
0.346	91.602	22.546
0.4613	93.649	22.279
0.5766	111.756	29.425
0.6919	136.32	29.687
0.8072	142.464	32.893
0.9226	147.823	30.657
1.0379	195.189	42.254
1.1532	291.142	39.109
1.2685	256.509	37.688
1.3839	212.699	40.234
1.4992	271.915	70.299
1.6145	269.069	169.644
1.7298	279.859	175.36
1.8451	263.688	305.757
1.9605	305.803	443.263
2.0758	355.244	530.223
2.1911	413.566	614.327
2.3064	539.905	713.928
2.4217	697.647	849.506
2.5371	914.631	993.889
2.6524	1131.24	1098.44
2.7677	1110.34	1232.09
2.883	1085.95	1139.14
2.9984	1048.9	949.07
3.1137	930.825	813.332
3.229	927.601	659.277
3.3443	1013.6	468.296
3.4596	1035.15	293.118
3.575	1078.38	198.375
3.6903	957.202	117.63
3.8056	703.078	97.245
3.9209	587.89	123.478
4.0362	540.931	127.421
4.1516	525.479	160.486
4.2669	552.955	315.697
4.3822	684.605	439.789
4.4975	813.663	789.978
4.6129	857.82	941.555
4.7282	967.787	1068.77
4.8435	1020.25	1127.13
4.9588	1059.06	1100.33
5.0741	1247.5	923.963
5.1895	1251.77	809.341
5.3048	1256.68	790.805
5.4201	1215.98	841.584
5.5354	1078.38	768.151
5.6507	1002.38	615.907
5.7661	855.984	453.902
5.8814	711.305	390.144
5.9967	550.234	240.052
6.112	425.273	206.714
6.2273	567.09	151.401
6.3427	564.395	154.881
6.458	855.558	127.495
6.5733	954.902	115.065
6.6886	1101.1	111.107
6.804	1057.91	136.109
6.9193	1111.57	179.323
7.0346	1146.69	265.217
7.1499	1096.38	416.25
7.2652	1101.23	558.331
7.3806	1063.12	718.811
7.4959	1032.11	884.684
7.6112	1036.71	998.579
7.7265	1123.44	1014.32
7.8418	1126.12	1147.86
7.9572	1141.8	1228.47
8.0725	1071.29	1174.8
8.1878	1010.7	865.116
8.3031	1059.44	834.994
8.4185	1089.84	564.707
8.5338	1049.12	390.628
8.6491	972.753	341.297
8.7644	645.233	174.927
8.8797	601.611	112.401
8.9951	376.63	83.031
9.1104	267.592	83.176
9.2257	258.21	73.253
9.341	229.038	59.061
9.4563	200.053	68.465
9.5717	187.373	79.179
9.687	256.575	120.717
9.8023	337.534	154.256
9.9176	386.811	200.376
10.0329	504.335	407.574
10.1483	702.668	670.695
10.2636	1210.8	847.303
10.3789	1218.56	1550.5
10.4942	1667.56	1395.26
10.6096	1504.4	1612.94
10.7249	1386.38	1427.25
10.8402	1468.77	1139.48
10.9555	1582.25	1081.21
11.0708	1457.73	944.961
11.1862	1842.59	1159.2
11.3015	1880.37	1204.77
11.4168	1858.15	1619.68
11.5321	1772.79	1972.67
11.6474	1813.03	2004.4
11.7628	1885.24	2003.04
11.8781	1994.12	2135.03
11.9934	2054.92	2180.14
12.1087	2100.5	2086.94
12.2241	2048.83	1940.96
12.3394	1961.46	1698.37
12.4547	1796.62	1451.08
12.57	1461.75	1139.7
12.6853	1254.33	1077.54
12.8007	1132.08	1123.29
12.916	959.237	872.066
13.0313	847.108	656.237
13.1466	766.368	317.469
13.2619	802.095	174.081
13.3773	781.088	149.84
13.4926	668.155	128.856
13.6079	695.982	89.332
13.7232	674.207	86.956
13.8386	684.853	69.608
13.9539	556.719	70.475
14.0692	526.319	72.047
14.1845	471.229	69.931
14.2998	392.5	70
