# Supplementary material for: The palmitoyl acyltransferase ZDHHC14 controls Kv1-family potassium channel clustering at the axon initial segment
Source: eLife. 2020 Nov 13;9:e56058. doi: 10.7554/eLife.56058 (PMC7685708; doi:10.7554/eLife.56058)
Supplement: Figure 9—source data 1. [file elife-56058-fig9-data1.xlsx]

## Sheet: Figure 9
Figure 9C															Figure 9F
mV	Control AAV							14sh1 AAV							pA	Control AAV																							14sh1 AAV
-80	-1.24934	-0.408875	-0.216228	0.0818962	-0.732754	-0.23771	-1.58702	-1.04225	-0.535973	-2.43574	-0.0477696	-0.17599	-0.492244	-0.395557	25	0	0	0	0	0	0	0	0	0	1	0	0	0	0	0	0	0	0	0	0	0	0	0	0	0	0	0	0	0	0	0	0	0	1
-65	0.28078	-0.0952452	0.205047	0.480452	-0.090002	0.291768	0.579728	-0.340253	0.00447094	-0.82269	0.0471463	0.296451	0.216752	0.879143	50	0	0	0	0	0	0	0	0	0	4	0	1	3	1	0	0	0	0	0	0	0	0	0	0	0	0	0	0	0	0	3	1	0	3
-50	1.9939	0.377961	0.819617	0.806417	0.07625	1.04346	2.92752	0.319439	0.599142	0.862195	0.175219	0.76262	0.954367	2.236	75	0	0	0	0	0	0	0	0	0	9	3	3	11	5	0	0	0	0	0	0	0	0	0	0	0	0	1	0	0	0	7	4	4	14
-35	4.40721	1.17889	1.99192	1.45701	0.75293	2.16667	6.17724	1.78372	1.92349	3.07274	0.364428	1.63722	1.82541	4.12788	100	2	0	0	0	0	0	0	0	0	12	4	10	10	9	0	0	0	3	0	0	0	2	0	0	0	2	2	0	0	0	9	7	9	20
-20	7.88168	2.87729	4.61367	3.62592	2.34147	4.00993	11.9639	5.27176	4.23081	6.01382	1.09591	3.22208	3.77536	7.227	125	3	0	0	0	1	2	1	0	0	14	8	9	13	11	0	0	0	4	0	1	0	5	0	1	0	2	8	2	0	0	10	14	16	21
-5	12.6416	6.32225	10.323	8.17827	4.71143	6.97542	19.8058	11.9674	7.68842	9.97829	2.81032	6.12059	6.6241	11.3622	150	4	0	0	0	3	6	2	1	1	16	14	15	18	12	0	0	0	7	1	2	0	6	0	4	0	5	13	4	0	2	12	19	17	25
10	19.0628	11.8914	17.0971	16.0221	8.61708	11.8769	29.2248	21.5374	12.089	15.6923	4.57787	11.8336	10.9433	16.2407	175	4	1	1	0	4	8	2	1	3	17	17	16	21	13	2	0	0	5	1	1	4	7	0	6	1	6	16	4	1	1	14	23	19	26
25	25.8936	18.0617	23.7008	25.0717	13.5763	17.7233	39.69	32.6116	17.1047	21.8952	5.87275	18.6333	16.1631	20.2974	200	5	1	2	2	4	11	2	2	4	19	19	20	23	14	2	0	0	8	1	4	3	8	1	9	1	7	17	6	1	8	17	25	9	27
40	33.9918	24.2471	30.4063	33.7273	18.5532	23.951	50.3925	43.124	22.1304	28.2668	6.73982	24.8395	22.1418	21.7366	225	6	1	2	1	4	14	2	4	5	19	22	21	23	15	2	1	0	5	1	4	9	8	1	11	1	6	26	7	4	9	18	26	9	27
55	43.1491	29.6594	35.7091	42.8274	23.4761	29.9386	61.1384	51.076	26.3678	34.334	6.56077	30.4307	27.8476	21.2775	250	6	1	2	3	5	20	4	5	5	20	19	24	25	15	4	1	0	8	1	6	9	9	1	7	1	4	26	9	4	9	22	29	8	29
70	48.924	34.554	37.7526	49.959	27.6615	35.2349	71.5945	60.5163	30.2942	39.7222	6.00937	34.0133	33.0299	19.5607
85	53.2949	37.2555	40.562	55.4566	31.0978	40.0169	81.6979	67.4391	33.0199	43.7139	5.53658	34.4051	37.3377	17.6529
100	55.7525	37.8007	46.2579	58.8173	33.743	43.7755	91.185	58.0619	33.312	45.7666	5.2473	30.2362	39.8288	16.829
[truncated: 58 more columns]
