# Supplementary material for: The palmitoyl acyltransferase ZDHHC14 controls Kv1-family potassium channel clustering at the axon initial segment
Source: eLife. 2020 Nov 13;9:e56058. doi: 10.7554/eLife.56058 (PMC7685708; doi:10.7554/eLife.56058)
Supplement: Table 1—source data 1. [file elife-56058-table1-data1.xlsx]

## Sheet: Table 1
Vhold (mV)		Rheobase (mA)		Peak amplitude (mV)		Half width (ms)		Max rise slope (mV/ms)		Max decay scope (mV/ms)		Input Resistance -25 pA		Input Resistance -50 pA		Input Resistance -75 pA		Input Resistance -100 pA		Peak dV/dt		Anti-peak dV/dt		Resting membrane potential (mV)
Control AAV	14sh1 AAV	Control AAV	14sh1 AAV	Control AAV	14sh1 AAV	Control AAV	14sh1 AAV	Control AAV	14sh1 AAV	Control AAV	14sh1 AAV	Control AAV	14sh1 AAV	Control AAV	14sh1 AAV	Control AAV	14sh1 AAV	Control AAV	14sh1 AAV	Control AAV	14sh1 AAV	Control AAV	14sh1 AAV	Control AAV	14sh1 AAV
-63.87	-62.13	25	50	102.231	76.87	2.55962	2.99795	120.427	56.25	-38.3436	-26.5625	319.623	430.544	222.196	383.146	222.24	347.996	219.538	334.619	120.542	54.9304	-38.1497	-25.9393	-49.98	-62.1843
-63.87	-62.13	75	50	103.39	94.4481	2.15869	2.41942	135.938	139.062	-50	-40.625	330.286	301.932	283.664	277.709	293.738	289.919	302.295	264.958	132.748	135.8	-48.8317	-39.6719	-56.0848	-64.898
-61.92	-62.13	50	75	101.196	72.8417	2.21292	3.34025	135.938	59.375	-45.3125	-23.4375	160.654	164.654	130.015	251.891	148.599	268.442	170.846	228.9	135.813	57.9821	-44.2495	-22.8877	-62.1617	-76.2224
-61.92	-62.13	50	25	106.994	81.4171	2.82121	3.36693	104.688	74.6951	-39.0625	-25.9146	149.563	294.066	120.539	377.456	130.599	339.921	144.04	452.356	102.241	74.7735	-38.1461	-25.9393	-42.4601	-49.3041
-61.92	-66.37	50	50	89.0806	83.9176	3.91675	3.06784	68.75	76.5625	-23.4375	-28.125	219.382	143.024	232.532	164.277	244.342	172.044	244.58	167.985	67.1435	74.7735	-22.8877	-27.4652	-64.6656	-56.7166
-61.92	-63.87	175	50	107.269	89.3827	2.53367	2.73008	177.734	73.4375	-48.8281	-32.8125	309	486.378	272.158	440.881	278.048	462.893	279.384	441.008	138.865	71.7147	-38.1461	-33.5686	-61.1583	-47.667
-61.78	-63.57	225	50	105.145	69.5514	2.53719	2.99504	179.688	39.0625	-48.8281	-31.25	234.263	156.99	219.846	206.94	239.404	147.568	224.307	175.465	140.378	38.1461	-38.1497	-30.5169	-63.2009	-56.1797
-62.43	-63.57	400	75	110.434	80.2936	1.8738	3.36005	214.939	46.875	-55.2147	-28.125	168.465	576.963	213.297	642.027	199.203	677.688	187.026	677.021	215.144	45.7797	-54.9356	-27.4678	-69.9123	-62.6259
-62.43	-63.57	100	150	90.9334	86.2751	2.90039	2.58408	76.5625	68.75	-32.8125	-34.375	285.339	184.224	333.84	246.045	333.542	267.134	326.357	234.55	74.7664	67.1435	-32.0427	-35.0944	-64.6456	-41.401
-62.43	-63.57	150	75	112.662	102.022	2.91808	2.69109	216.797	104.688	-42.9688	-37.5	538.935	544.937	557.986	495.663	535.268	588.724	479.742	569.129	169.369	102.232	-35.0944	-36.6203	-55.3468	-48.1975
-62.43	-63.57	125	125	113.547	95.2472	2.51916	2.91556	197.266	71.875	-52.7344	-35.9375	286.479	707.219	295.498	742.825	309.636	709.562	291.628	708.801	155.636	70.1955	-42.7277	-35.0978	-43.4738	-55.9826
-62.13	-60.97	175	75	103.359	90.3889	2.49064	2.0069	160.156	123.438	-44.9219	-43.75	553.123	604.14	539.763	593.167	492.727	594.576	454.366	600.922	125.131	120.542	-38.1461	-44.2537	-55.0512	-50.4925
-62.13	-60.41	100	75	106.167	75.3026	2.45769	3.31562	137.5	42.1875	-42.1875	-28.125	565.933	502.737	513.579	468.89	567.522	604.661	537.755	578.19	134.274	41.2017	-41.2017	-27.4678	-62.153	-57.5034
-62.13	-65.15	200	100	114.101	100.093	2.92864	2.16792	212.891	114.062	-44.9219	-45.3125	431.292	492.732	466.521	421.592	459.947	457.074	394.997	401.089	166.317	112.923	-35.0978	-44.2537	-54.3245	-49.4487
-64.85	-62.92	100	100	110.535	75.4322	2.05519	3.71423	185.938	35.9375	-50	-26.5625	138.816	439.186	149.025	522.728	154.95	463.742	161.835	444.08	181.575	35.0944	-48.827	-25.9393	-58.1572	-51.2125
-64.22	-62.92	175	75	103.16	101.494	2.8747	2.48324	197.266	118.75	-41.0156	-37.5	161.534	241.07	187.334	320.352	198.572	295.934	198.228	272.32	114.438	115.975	-32.0458	-36.6203	-61.2573	-36.5928
-60.89	-64.8	175	125	90.7972	87.9628	3.75942	2.61552	95.7031	92.1875	-27.3438	-32.8125	117.837	817.742	150.419	721.522	176.214	586.602	181.783	527.735	74.7735	90.0248	-22.8877	-32.0427	-68.313	-58.9563
-63.56	-62.96	200	50	93.6503	102.969	3.07498	1.70651	97.6562	203.125	-37.1094	-54.6875	488.766	476.241	558.428	442.585	524.248	416.208	477.349	337.302	77.8255	201.411	-28.9938	-54.9304	-69.9087	-58.0369
-66.48	-62.35	125	100	108.991	81.6066	2.26799	5.95331	190.625	71.875	-42.1875	-12.5	307.419	402.265	356.063	431.9	365.306	485.751	347.125	461.743	186.171	70.1888	-41.2017	-12.2079	-67.2406	-49.595
-64.6	-63.81	125	75	95.8805	80.1064	3.17526	5.01336	112.5	37.5	-28.125	-17.1875	354.138	246.868	357.38	320.46	322.354	338.216	304.03	340.366	112.912	36.6203	-27.4678	-16.7843	-76.2221	-63.5974
-64.6	-62.96	125	125	104.883	93.0198	2.31495	2.28215	167.188	121.875	-43.75	-37.5	433.421	223.216	464.927	347.767	386.465	324.218	356.474	314.453	163.281	119.027	-42.7277	-38.1461	-62.1344	-54.3538
-63	-63.84	150	175	93.1208	95.2121	2.75604	2.2445	121.094	181.641	-39.0625	-50.7812	505.398	154.798	499.124	180.416	420.08	160.341	395.905	176.233	97.6633	141.917	-32.0427	-39.6757	-60.3591	-55.4001
-66.72	-62.35	150	150	109.17	94.6071	2.41816	3.51241	238.281	111.328	-52.7344	-31.25	412.001	453.323	391.45	419.492	354.992	454.898	323.396	440.953	186.171	86.9814	-41.1978	-25.9418	-63.6105	-53.667
